# Supplementary material
Source: PubMed Central journal article supplement (PMC1861363)
Supplement: heart_93_1_137__1.pdf [file heart_93_1_137__1.pdf]

## Thrombosis of prosthetic heart valves: diagnosis and therapeutic considerations (ht71183)

R Roudaut, K Serri, S Lafitte

Web only refs

1. Paris M. Rétrécissement considerable de l'aorte pectorale observé à l'Hotel Dieu de Paris. *Jour de Chirurgie de Desault* 1791;ii:107.
2. Lewis T. Material relating to coarctation of the adult type. *Br Heart J* 1933;16:205–61.
3. Abbott ME. Statistical study and historical retrospect of 200 recorded cases, with autopsy, of stenosis or obliteration of the descending arch in subjects above the age of two years. *Am Heart J* 1928;3:392–421 and 574–618.
4. Reifenstein GH, Levine SA, Gross RE. Coarctation of the aorta: a review of 104 autopsied cases of the 'adult-type', 2 years of age or older. *Am Heart J* 1947;33:146–68.
5. Campbell M. Natural history of coarctation of the aorta. *Br Heart J* 1970;32:633–40.
6. Crafoord C, Nylin G. Congenital coarctation of the aorta and its surgical treatment. *J Thorac Surg* 1945;14:347–61.
7. Singer MI, Rowen M, Dorsy TJ. Transluminal aortic balloon angioplasty for coarctation of the aorta in the newborn. *Am Heart J* 1982;103:131–2.
8. O'Laughlin MP, Perry SB, Lock JE, *et al.* Use of endovascular stents in congenital heart disease. *Circulation* 1991;83:1923–1939.
9. Therrien J, Thorne SA, Wright A, *et al.* Repaired coarctation: a 'cost effective' approach to identify complications in adults. *J Am Coll Cardiol* 2000;35:997–1002.
10. Bower C, Ramsay JM. Congenital heart disease: A 10 year cohort. *Journal of Paediatrics & Child Health* 1994;30:414–418.
11. Campbell M, Polani PE. The aetiology of coarctation of the aorta. *Lancet* 1961;i:463–8.
12. Morrow WR, Huhta JC, Murphy DJ Jr, *et al.* Quantitative morphology of the aortic arch in neonatal coarctation. *J Am Coll Cardiol* 1986;8:616–20.
13. Gotzsche C-O, Krag-Olsen B, Nielsen J, *et al.* Prevalence of cardiovascular malformations and association with karyotypes in Turner's syndrome. *Archives of Disease in Childhood* 1994;71:433–436.
14. Marx GR. "Repaired" Aortic Coarctation in Adults: Not a "Simple" Congenital Heart Defect. *JACC* 2000;35:1003–6.
15. Allan LD, Chita SK, Anderson RH, *et al.* Coarctation of the aorta in prenatal life: an echocardiographic, anatomical, and functional study. *Br Heart J* 1988;59:356–60.
16. Sharland GK, Chan KY, Allan LD. Coarctation of the aorta: difficulties in prenatal diagnosis. *Br Heart J* 1994;71:70–5.
17. Franklin O, Burch M, Manning N, *et al.* Prenatal diagnosis of coarctation of the aorta improves survival and reduces morbidity. *Heart* 2002;87:67–9.
18. Paladini D, Volpe P, Russo MG, *et al.* Aortic coarctation: prognostic indicators of survival in the fetus. *Heart* 2004;90:348–349.
19. Mehwald PS, Dittrich S, Grohmann J, *et al.* Coarctation of the aorta presenting as cerebral hemorrhage. *Journal of Pediatrics* 2005;146:293.

20. Dietl CA, Torres AR, Favaloro RG, *et al.* Risk of recoarctation in neonates and infants after repair with patch aortoplasty, subclavian flap, and the combined resection-flap procedure. *J Thorac Cardiovasc Surg* 1992;**103**:724–32.
21. Sciolaro C, Copeland J, Cork R, *et al.* Long-term follow-up comparing subclavian flap angioplasty to resection with modified oblique end-to-end anastomosis. *J Thorac Cardiovasc Surg* 1991;**101**:1–13.
22. Sweeney MS, Walker WE, Duncan JM, *et al.* Reoperation for aortic coarctation: techniques, results, and indications for various approaches. *Ann Thorac Surg* 1985;**40**:46–9.
23. Grinda JM, Mace L, Dervanian P, *et al.* Bypass graft for complex forms of isthmic aortic coarctation in adults. *Ann Thorac Surg* 1995;**60**:1299–302.
24. Elkerdany A, Hassouna A, Elsayegh T, *et al.* Left subclavian-aortic bypass grafting in primary isolated adult coarctation. *Cardiovasc Surg* 1999;**7**:351–4.
25. Mendelsohn AM, Crowley DC, Lindauer A, *et al.* Rapid progression of aortic aneurysms after patch aortoplasty repair of coarctation of the aorta. *J Am Coll Cardiol* 1992;**20**:381–5.
26. Parks WJ, Ngo TD, Plauth WH, *et al.* Incidence of aneurysm formation after Dacron patch aortoplasty repair for coarctation of the aorta: long-term results and assessment utilizing magnetic resonance angiography with three-dimensional surface rendering. *J Am Coll Cardiol* 1995;**26**:266–271.
27. Todd PJ, Dangerfield PH, Hamilton DI, *et al.* Late effects on the left upper limb of subclavian flap aortoplasty. *J Thorac Cardiovasc Surg* 1983;**85**:678–81.
28. Van Son JA, van Asten WN, van Lier HJ, *et al.* Detrimental sequelae on the hemodynamics of the upper left limb after subclavian flap angioplasty in infancy. *Circulation* 1990;**81**:996–1004.
29. Backer CL, Mavroudis C, Zias EA, *et al.* Repair of coarctation with resection and extended end-to-end anastomosis. *Ann Thorac Surg* 1998;**66**:1365–1370.
30. Elgamal M-A, McKenzie ED, Fraser CD. Aortic Arch Advancement: The Optimal One-Stage Approach for Surgical Management of Neonatal Coarctation With Arch Hypoplasia. *Ann Thorac Surg* 2002;**73**:1267–73.
31. Brouwer MHJ, Cromme-Dijkhuis AH, Ebels T, *et al.* Growth of the hypoplastic aortic arch after simple coarctation resection and end-to-end anastomosis. *J Thorac Cardiovasc Surg* 1992;**104**:426–433.
32. Jahangiri M, Shinebourne EA, Zurakowski D, *et al.* Subclavian flap angioplasty: does the arch look after itself? *J Thorac Cardiovasc Surg* 2000;**120**:224–9.
33. Kiraly L, Környei L, Mogyorossy G, *et al.* Hypoplastic aortic arch in newborns rapidly adapts to post-coarctectomy circulatory conditions. *Heart* 2005;**91**:233–234.
34. Brewer LA III, Fosburg RG, Mulder GA, *et al.* Spinal cord complications following surgery for coarctation of the aorta. *J Thorac-Cardiovasc Surg* 1972;**64**:368–381.
35. Keen G. Spinal cord damage and operations for coarctation of the aorta: etiology, practice and prospects. *Thorax* 1987;**42**:11–18.
36. Wong CH, Watson B, Smith J, *et al.* The use of left heart bypass in adult and recurrent coarctation repair. *European Journal of Cardio-thoracic Surgery* 2001;**20**:1199–1201.

37. Lange R, Thielmann M, Schmidt KG, *et al.* Spinal cord protection using hypothermic cardiocirculatory arrest in extended repair of recoarctation and persistent hypoplastic aortic arch. *Eur J Cardiothorac Surg* 1997;**11**:697–702.
38. Rokkas CK, Murphy SF, Kouchoukos NT. Aortic coarctation in the adult: management of complications and coexisting arterial abnormalities with hypothermic cardiopulmonary bypass and circulatory arrest. *J Thorac Cardiovasc Surg* 2002;**124**:155–161.
39. Gudbjartsson T, Mathur M, Mihaljevic T, *et al.* Hypothermic circulatory arrest for the surgical treatment of complicated adult coarctation of the aorta. *J Am Coll Cardiol* 2003;**41**:849–851.
40. Hellebrand WE, Allen HD, Golinko RJ, *et al.* Balloon angioplasty for aortic recoarctation: Results of the valvuloplasty and angioplasty of congenital anomalies registry. *Am J Cardiol* 1990;**65**:793–797.
41. Isner JM, Donaldson RF, Fulton D. Cystic medial necrosis in coarctation of the aorta. *Circulation* 1987;**75**:689–95.
42. Balaji S, Oommen R, Rees PG. Fatal aortic rupture during balloon dilatation of recoarctation. *Br Heart J* 1991;**65**:100–101.
43. Redington AN, Booth P, Shore DF, *et al.* Primary balloon dilatation of coarctation of the aorta in neonates. *Br Heart J* 1990;**64**:277–281.
44. Shaddy RE, Boucek MM, Sturtevant JE, *et al.* Comparison of angioplasty and surgery for unoperated coarctation of the aorta. *Circulation* 1993;**87**:793–9.
45. Knyshov GV, Sitar LL, Glagola MD, *et al.* Aortic aneurysms at the site of the repair of coarctation of the aorta: a review of 48 patients. *Ann Thorac Surg* 1996;**61**:935–9.
46. Fujita T, Fukushima N, Taketani S, *et al.* Late true aneurysm after bypass grafting for long aortic coarctation. *Ann Thorac Surg* 1996;**62**:1511–3.
47. Kino K, Sano S, Sugawara E, *et al.* Late aneurysm after subclavian flap aortoplasty for coarctation of the aorta. *Ann Thorac Surg* 1996;**61**:1262–4.
48. Ovaert C, Benson LN, Nykanen D, *et al.* Transcatheter treatment of coarctation of the aorta: a review. *Pediatr Cardiol* 1998;**19**:27–44.
49. Suarez de Lezo J, Pan M, Romero M, *et al.* Immediate and follow-up findings after stent treatment for severe coarctation of aorta. *Am J Cardiol* 1999;**83**:400–6.
50. Marshall AC, Perry SB, Keane JF, *et al.* Early results and medium-term follow-up of stent implantation for mild residual or recurrent aortic coarctation. *Am Heart J* 2000;**139**:1054–60.
51. Magee AG, Brzezinska-Rajszyk G, Qureshi SA, *et al.* Stent implantation for Aortic Coarctation and Recoarctation. *Heart* 1999;**82**:600–606.
52. Magee AG, Blauth CI, Qureshi SA. Interventional and Surgical Management of Aortic Stenosis and Coarctation. *Ann Thorac Surg* 2001;**71**:713–5.
53. Balakrishnan KR, Thanikachalam S, Murthy JS, *et al.* Severe coronary artery disease with coarctation of the aorta: Role of off-pump coronary artery bypass grafting. *Annals of Thoracic Surgery* 2005;**79**:343–345.
54. Ince H, Petzsch M, Rehders T, *et al.* Percutaneous endovascular repair of aneurysm after previous coarctation surgery. *Circulation* 2003;**108**:2967–2970.
55. Hanley FL. The various therapeutic approaches to aortic coarctation: Is it fair to compare? *Journal of the American College of Cardiology* 1996;**27**:471–472.

56. Rao PS. Should balloon angioplasty be used instead of surgery for native aortic coarctation? *Br Heart J* 1995;**74**:578–9.
57. Sakopoulos AG, Hahn TL, Turrentine M, *et al.* Recurrent aortic coarctation: is surgical repair still the gold standard? *J Thorac Cardiovasc Surg* 1998;**116**:560–5.
58. Zoghbi J, Serraf A, Mohammadi S, *et al.* Is surgical intervention still indicated in recurrent aortic arch obstruction? *J Thorac Cardiovasc Surg* 2004;**127**:203–211.
59. Rosenthal E. Stent implantation for aortic coarctation: the treatment of choice in adults? *J Am Coll Cardiol* 2001;**38**:1524–1527.
60. Mullen MJ. Coarctation of the aorta in adults: do we need surgeons? *Heart* 2003;**89**:3–5.
61. Gibbs JL. Treatment options for coarctation of the aorta. *Heart* 2000;**84**:11–13.
62. Presbitero P, Demarie D, Villani M, *et al.* Long term results (15–30 years) of surgical repair of aortic coarctation. *Br Heart J* 1987;**57**:462–7.
63. Cohen M, Fuster V, Steele PM, *et al.* Coarctation of the aorta. Long-term follow-up and prediction of outcome after surgical correction. *Circulation* 1989;**80**:840–5.
64. Therrien J, Warnes C, Daliendo L, *et al.* Canadian Cardiovascular Society Consensus Conference 2001 update: recommendations for the management of adults with congenital heart disease part III. *Can J Cardiol* 2001;**17**:1135–1158.
65. Deanfield J, Thaulow E, Warnes C, *et al.* Management of grown up congenital heart disease. *Eur Heart J* 2003;**24**:1035–1084.
66. de Divitiis M, Pilla C, Kattenhorn M, *et al.* Ambulatory blood pressure, left ventricular mass, and conduit artery function late after successful repair of coarctation of the aorta. *J Am Coll Cardiol* 2003;**41**:2259–65.
67. Beekman RH, Katz BP, Moorehead-Steffens C, *et al.* Altered baroreceptor function in children with systolic hypertension after coarctation repair. *Am J Cardiol* 1983;**52**:112–117.
68. Johnson D, Perrault H, Vobecky SJ, *et al.* Resetting of the cardiopulmonary baroreflex 10 years after surgical repair of coarctation of the aorta. *Heart* 2001;**85**:318–325.
69. Cyran SE, Grzeszczak M, Kaufman K, *et al.* Aortic “recoarctation” at rest versus at exercise in children as evaluated by stress Doppler echocardiography after a “good” operative result. *Am J Cardiol* 1993;**71**:963–70.
70. Vriend JWJ, Van Montfrans GA, Romkes HH, *et al.* Relation between exercise-induced hypertension and sustained hypertension in adult patients after successful repair of aortic coarctation. *Journal of Hypertension* 2004;**22**(3):501–509.
71. Daniels SR. Repair of coarctation of the aorta and hypertension: does age matter? *Lancet* 2001;**358**:89.
72. Vlodayer Z, Neufeld HN. The coronary arteries in coarctation of the aorta. *Circulation* 1968;**37**:449–54.
73. Warnes CA. Bicuspid aortic valve and coarctation: two villains part of a diffuse problem. *Heart* 2003;**89**:965–6.
74. Roos-Hesselink JW, Schölzel BE, Heijdra RJ, *et al.* Aortic valve and aortic arch pathology after coarctation repair. *Heart* 2003;**89**:1074–1077.
75. Gardiner HM, Celermajer DS, Sorensen KE, *et al.* Arterial reactivity is significantly impaired in normotensive young adults after successful repair of aortic coarctation in childhood. *Circulation* 1994;**89**:1745–50.

76. de Divitiis M, Pilla C, Kattenhorn M, *et al.* Vascular dysfunction after repair of coarctation of the aorta: impact of early surgery. *Circulation* 2001;**104**(Suppl I):I-165–70.
77. Guenthard J, Wyler F. Exercise-induced hypertension in the arms due to impaired arterial reactivity after successful coarctation resection. *Am J Cardiol* 1995;**75**:814–817.
78. Pfammatter J-P, Berdat P, Carrel T. Impaired poststenotic aortic pulsatility after hemodynamically ideal coarctation repair in children. *Pediatric Cardiology* 2004;**25**:495–499.
79. Brili S, Dernellis J, Aggeli C, *et al.* Aortic elastic properties in patients with repaired coarctation of aorta. *Am J Cardiol* 1998;**82**:1140–1143.
80. Vriend JJW, De Groot E, Kastelein JJP, *et al.* Carotid and femoral B-mode ultrasound intima-media thickness measurements in adult post-coarctectomy patients. *International Angiology* 2004;**23**:41–46.
81. Lip G, Singh S, Beevers D, *et al.* Aortic coarctation diagnosed after hypertension in pregnancy. *Am J Obstet Gynecol* 1998;**179**:814–815.
82. Plunkett MD, Bond LM, Geiss DM. Staged repair of acute type I aortic dissection and coarctation in pregnancy. *Ann Thorac Surg* 2000;**69**:1945–1947.
83. Walker E, Malins AF. Anaesthetic management of aortic coarctation in pregnancy. *International Journal of Obstetric Anesthesia* 2004;**13**:266–270.
84. Perloff JK. Coarctation of the aorta. In: Perloff JK, Ed. *The Clinical Recognition of Congenital Heart Disease*, 4th ed. Philadelphia: Saunders, 1994:132–169.
85. Lin AE, Lippe BM, Geffner ME, *et al.* Aortic dilation, dissection, and rupture in patients with Turner syndrome. *J Pediatr* 1986;**109**:820–826.
86. Celermajer DS, Greaves K. Survivors of coarctation repair: fixed but not cured. *Heart* 2002;**88**:113–114.
